# Supplementary material for: Assessment of oral health in older adults by non-dental professional caregivers—development and validation of a photograph-supported oral health–related section for the interRAI suite of instruments
Source: PubMed Central journal article supplement (PMC8137625; doi:10.1007/s00784-020-03669-8), 2020-11-16
Supplement: 784_2020_3669_MOESM2_ESM.pdf [file 784_2020_3669_MOESM2_ESM.pdf]

# Optimized photograph-supported ohr-interRAI section

## 1. General utilization guidelines

### Relevance

- Good oral health contributes to general health and well-being.

### Aim

- Detect clients who need assistance with daily oral hygiene and/or referral to a dentist

### Communication

- Inform clients that you will ask questions about the mouth and that you will look into the mouth as well.
- Talk to clients themselves. Turn to family or caregivers only if clients are not able to communicate.

### Inspection of the mouth

- Ask clients to take out dentures. Help, if necessary.
- Make sure that the head of clients is supported during the inspection.
- Wear examination gloves and use flashlights for illumination.
- Ask clients to open the mouth. For better view, pull cheeks and lips away with your finger or with the handle of a toothbrush.

If you are not certain, register presence of oral health problems.

## 2. Definitions and guidelines per item

### 2.a Chewing problems

How well could you chew in the last 3 days?

- I could chew all kinds of food.
- I only had problems with hard or chewy food (e.g. nuts, raw apples, steak).
- I also had problems with soft food (e.g. cooked potatoes, banana, cake).
- Cannot be assessed/mixed food due to swallowing issues

Guidelines and definitions

- If clients don't have or don't wear dentures during meals, ask how chewing goes without dentures. If clients wear dentures during meals, assess chewing with the dentures.
- If food is blended/pureed due to chewing problems, register accordingly. If food is blended/pureed due to other reasons such as dysphagia, register that chewing cannot be assessed.
- If clients are not able to communicate, turn to primary caregivers and family or observe clients during meals and look out for nonverbal signs.

### 2.b Discomfort or pain

How often did you had discomfort or pain in the last 3 days?

- Not in last 3 days
- Not every day
- Every day
- Cannot be assessed

Guidelines and definitions

- Register discomfort or pain regardless of the underlying cause and whether appearing in rest, during meals or during oral care. Dentures might also cause discomfort or pain.
- If clients are not able to communicate, turn to primary caregivers and family or observe clients and look out for nonverbal signs.

### 2.c Dry mouth

How often did you had discomfort or pain in the last 3 days?

- Not in last 3 days
- Not every day
- Every day
- Cannot be assessed

Guidelines and definitions

- The mouth can feel dry in rest or during meals. Clients might also mention dry lips.
- If clients are not able to communicate, turn to primary caregivers and family or observe and look out for nonverbal signs.

## 2.d Denture hygiene

- $<1/3$  of the inner surface is covered by plaque or tartar

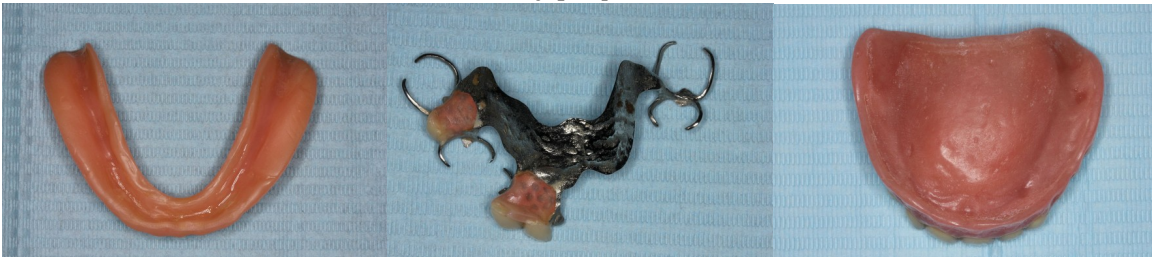

- $\geq 1/3$  of the inner surface is covered by plaque or tartar

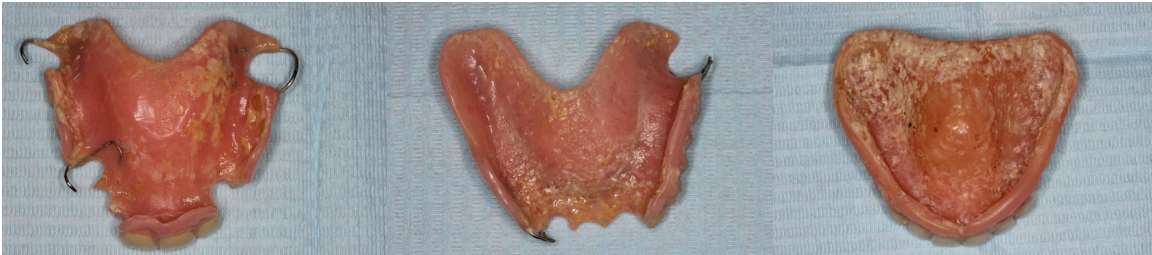

- Cannot be assessed/does not have or does not wear dentures

### Guidelines and definitions

- Inner surface: surface that covers and rests on the gums.
- Plaque: sticky deposit that is white or pale yellow, can be removed with toothbrushing.
- Tartar: hard deposit that is yellow or brown, cannot be removed with toothbrushing.
- Take out dentures and rinse under water to remove food remnants.
- If clients wear dentures in upper and lower jaw, assess the denture with the poorest hygiene.

## 2.e Oral hygiene

- $<1/3$  of the surface of teeth or denture retainers is covered by plaque or tartar

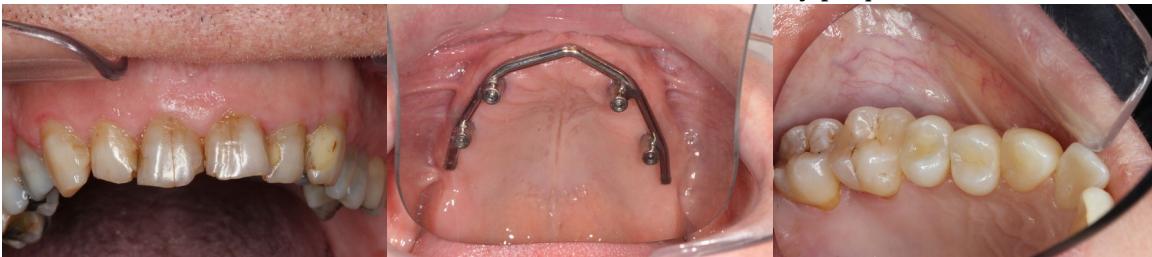

- $\geq 1/3$  of the surface of teeth or denture retainers is covered by plaque or tartar

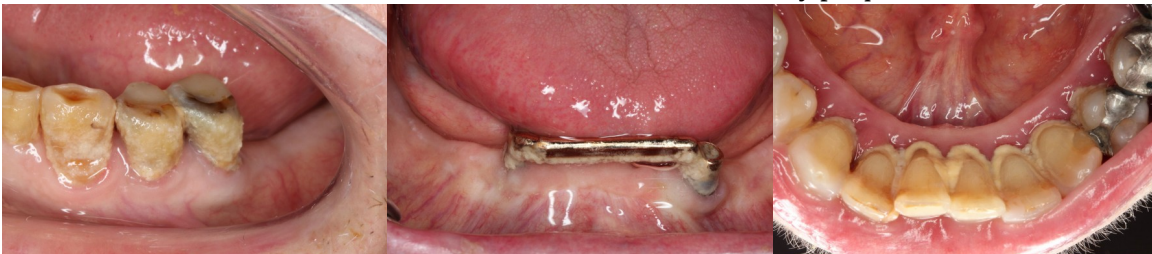

- Cannot be assessed/does not have teeth or denture retainers

### Guidelines and definitions

- Denture retainers: attachments that are fixed in the mouth to anchor the denture.
- Inspect all surfaces of teeth, spaces between teeth and denture retainers.
- Assess the area of the mouth with the poorest hygiene.



## 2.f Teeth

- All teeth sound, adequately filled, maybe with tooth wear

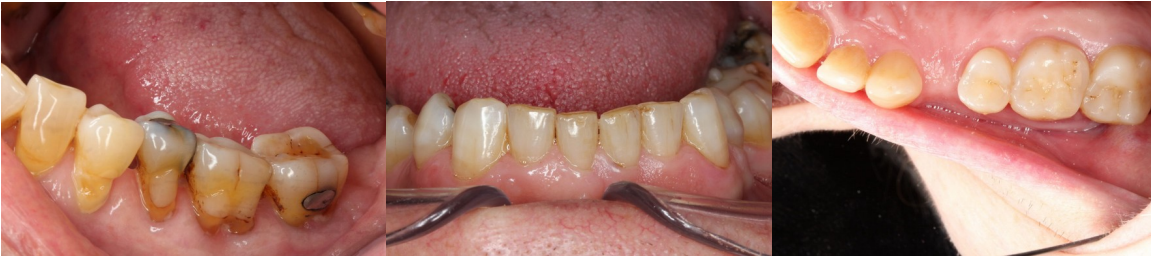

- One or more teeth broken, decayed or with defect fillings; root remnants

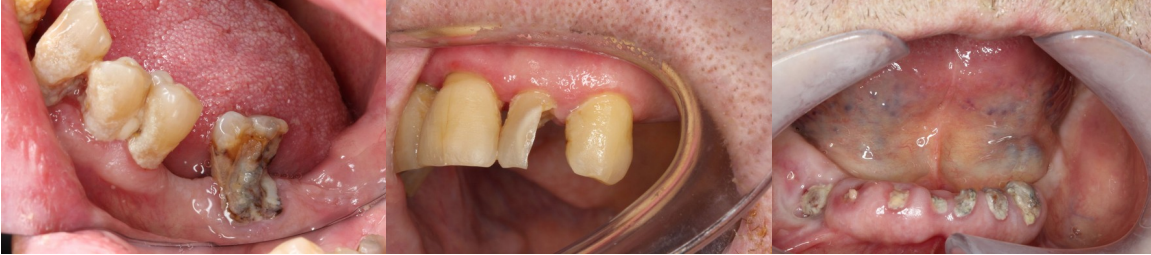

- Cannot be assessed/does not have teeth

### Guidelines and definitions

- Wear: teeth evenly flat and shortened.
- Tooth decay: cavities that are stained orange or brown; large cavities can cause breakage of teeth.
- Defect filling: filling fell out or is broken; space or tooth decay at interface between tooth and filling.
- Root remnant: crown of tooth is missing; upper part of the remaining root is visible.
- Inspect the different surfaces of all teeth.

## 2.g Gums

- Pink and firm, maybe minor aberration in color or texture

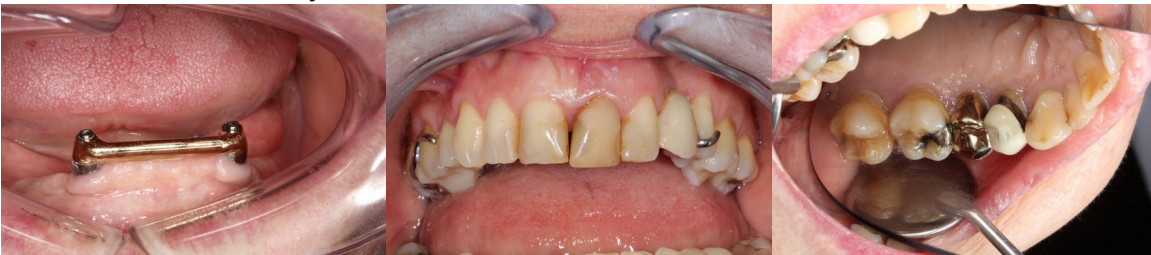

- One or more sites with redness, swelling, glassy, with sores or spontaneous bleeding

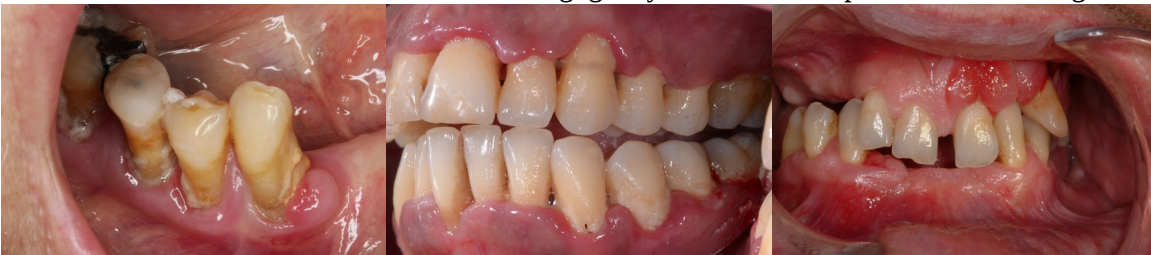

- Cannot be assessed

### Guidelines and definitions

- Gums: pink tissue surrounding teeth or denture retainers.
- If clients don't have teeth or denture retainers, inspect the areas of the jaws where usually the teeth are located.
- Look out for general and localized gum problems.

## 2.h Tongue

- Pink, moist, healthy

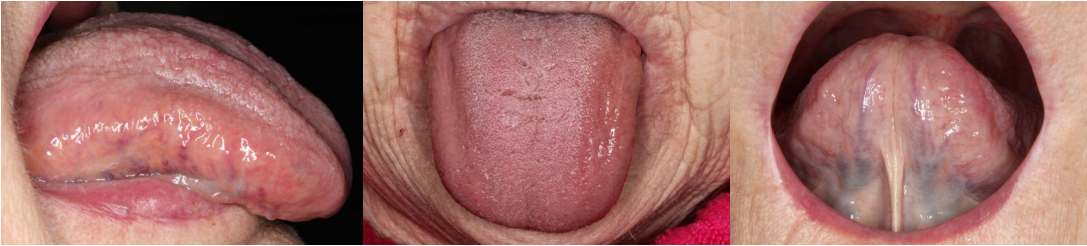

- One or more sites red, dry, swollen, with sores or patches

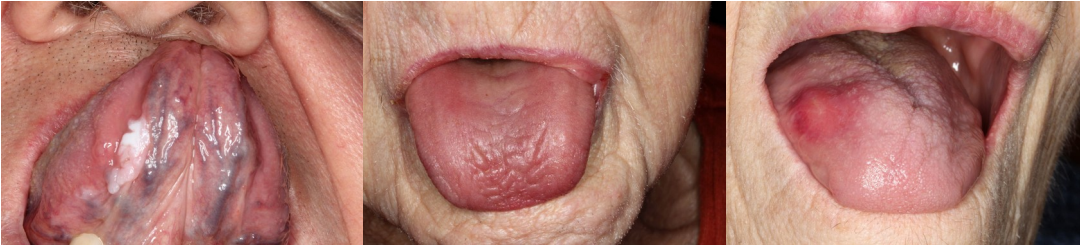

- Cannot be assessed

### Guidelines and definitions

- Ask the client to extend the tongue out of the mouth. Inspect the upper and the lateral surfaces of the tongue.
- Then ask the client to curl the tongue upward to inspect the lower surface and the area under the tongue.

## 2.i Palate and inner surfaces of cheeks and lips

- Smooth, moist, pink

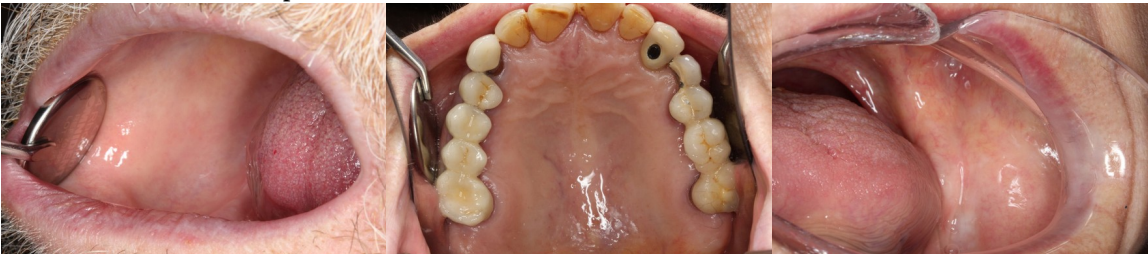

- One or more sites red, dry, swollen, with sores or patches

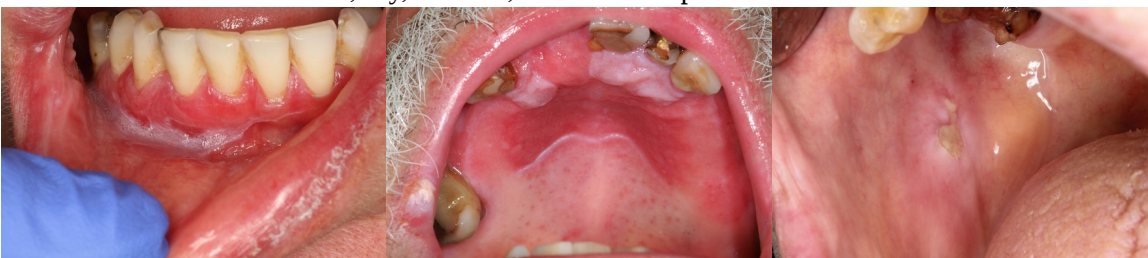

- Cannot be assessed

### Guidelines and definitions

- Inspect the palate and the inner surfaces of cheeks and lips.
